# Supplementary material for: One-step synthesis of magnetic 1,6-hexanediamine-functionalized reduced graphene oxide–zinc ferrite for fast adsorption of Cr(vi)
Source: Royal Society of Chemistry journal article supplement (doi:10.1039/c5ra00856e), 2015-01-01
Supplement: c5ra00856e1.pdf [file c5ra00856e1.pdf]

## Supplementary Material

### Characterization of materials, adsorption kinetics, isotherms and thermodynamic

#### 1. Characterization of materials

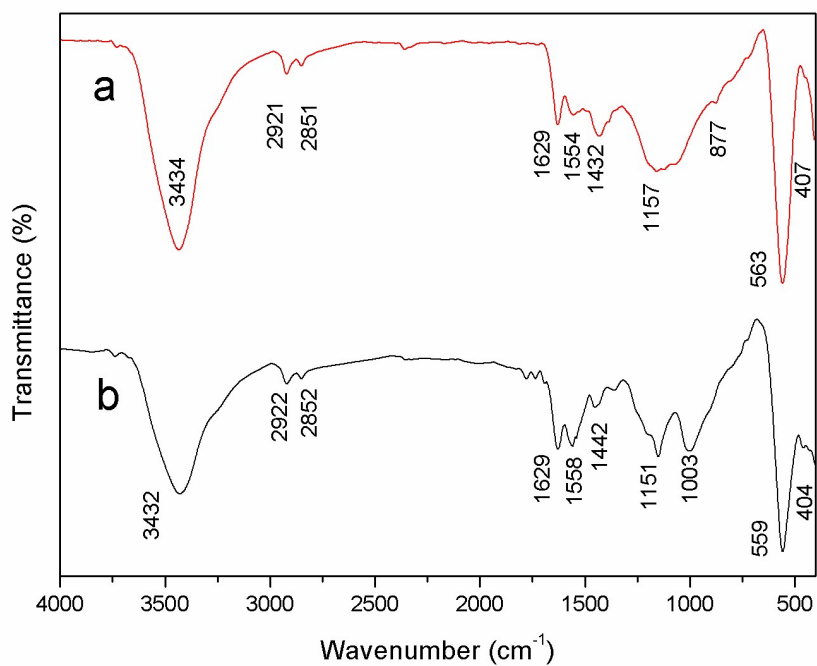

**Fig. S1.** FTIR spectra of (a) HDA-RGO-ZnFe<sub>2</sub>O<sub>4</sub>, (b) HDA-RGO-ZnFe<sub>2</sub>O<sub>4</sub> after desorption treatment

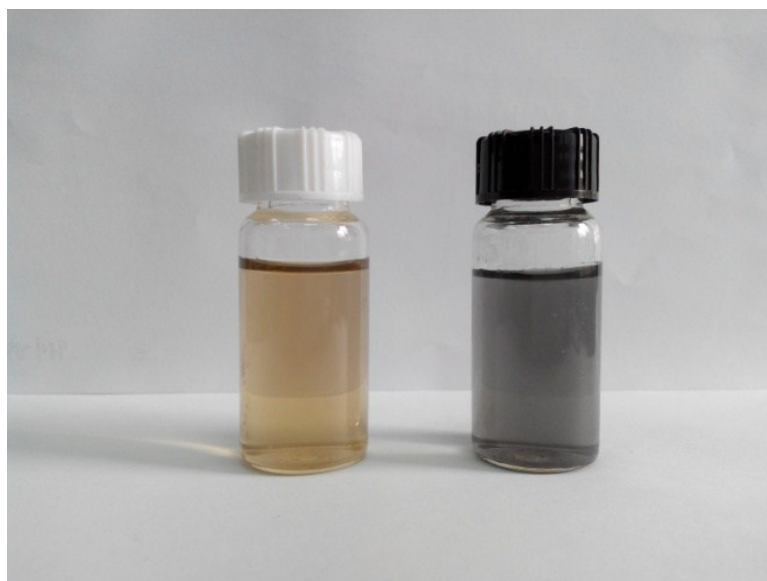

**Fig. S2.** (a) GO dispersion, (b) RGO dispersion

## 2. Adsorption Kinetics

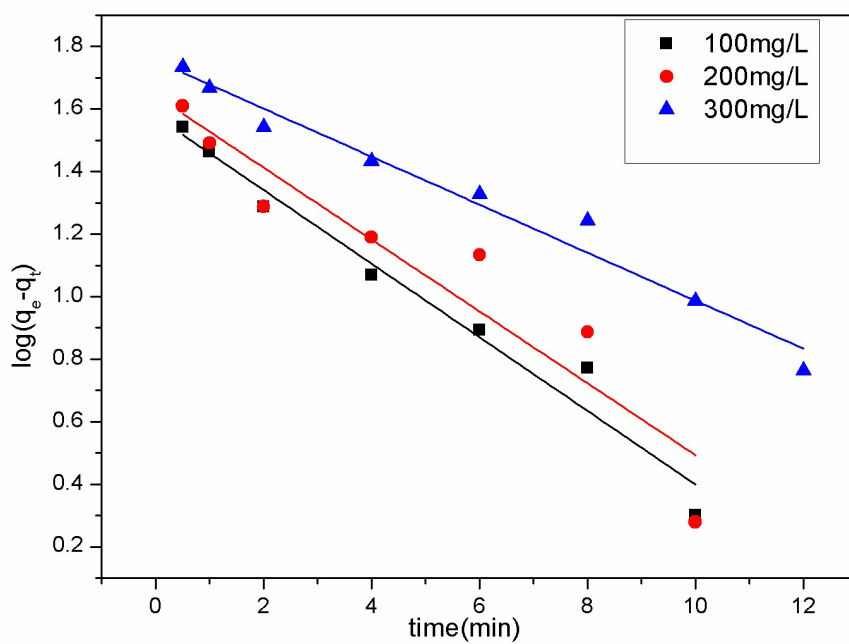

**Fig. S3.** Plot of the pseudo-first-order kinetic model for Cr (VI) on HDA-RGO-ZnFe<sub>2</sub>O<sub>4</sub> at different initial solution concentrations.

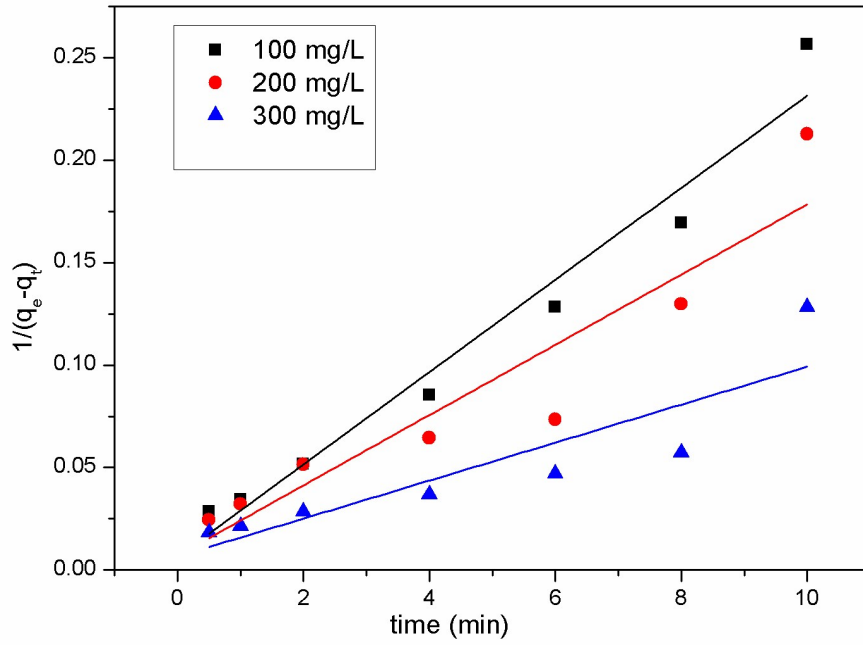

**Fig. S4.** Plot of the second-order kinetic model for Cr (VI) on HDA-RGO-ZnFe<sub>2</sub>O<sub>4</sub> at different initial solution concentrations.

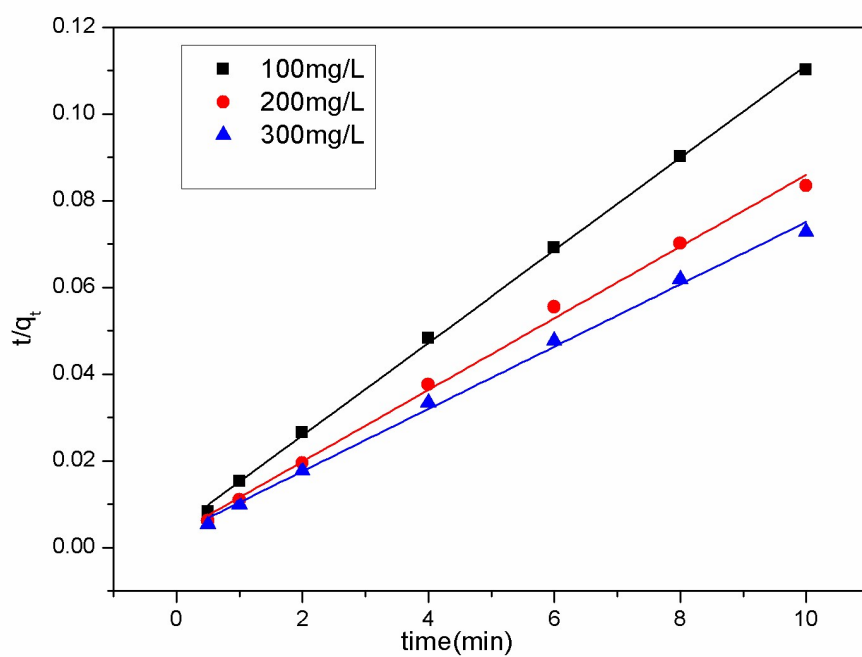

**Fig. S5.** Plot of the pseudo-second-order kinetic model for Cr (VI) on HDA-RGO-ZnFe<sub>2</sub>O<sub>4</sub> at different initial solution concentrations.

### 3. Adsorption Isotherms

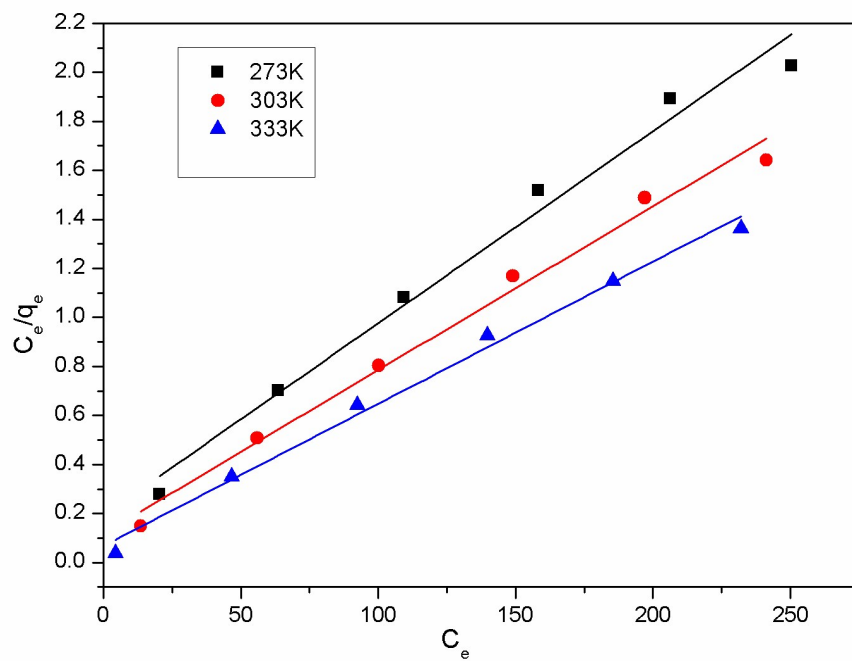

**Fig. S6.** Langmuir adsorption isotherm plots for Cr (VI) adsorption onto HDA-RGO-ZnFe<sub>2</sub>O<sub>4</sub> at different temperatures.

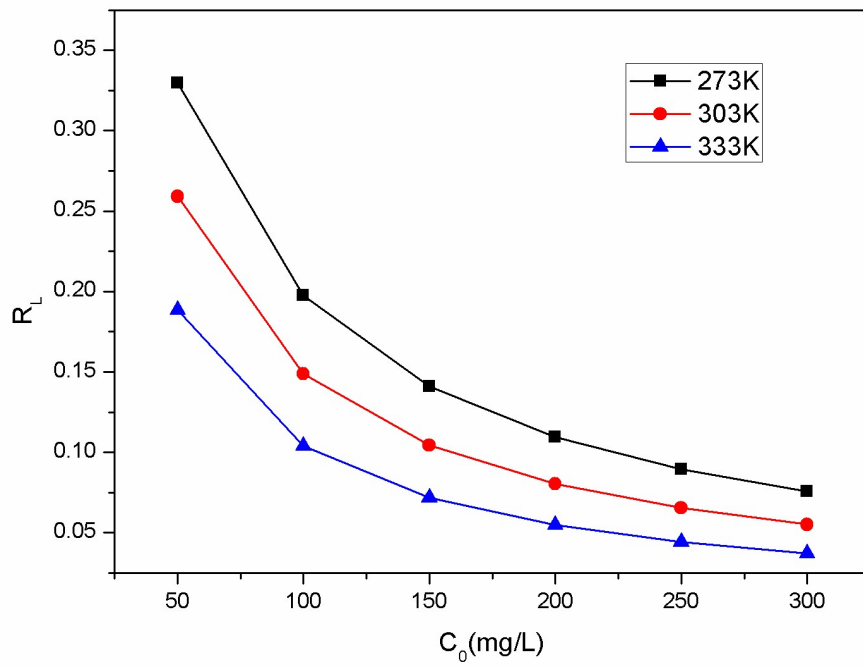

**Fig. S7.** Separation factor of Cr (VI) adsorbed onto HDA-RGO-ZnFe<sub>2</sub>O<sub>4</sub> at different temperatures.

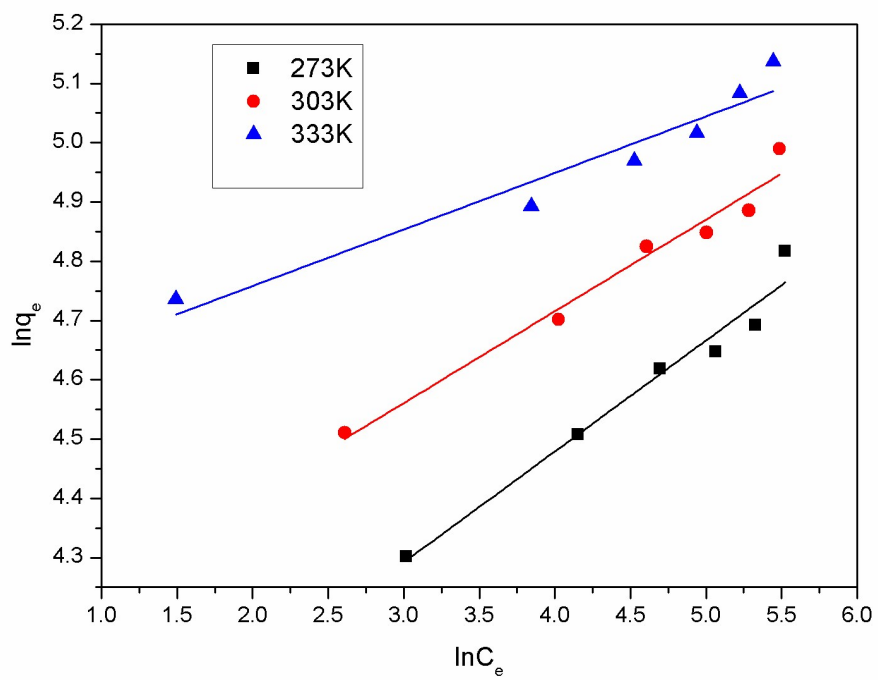

**Fig. S8.** Freundlich adsorption isotherm plots for Cr (VI) adsorption onto HDA-RGO-ZnFe<sub>2</sub>O<sub>4</sub> at different temperatures.

#### 4. Adsorption Thermodynamic

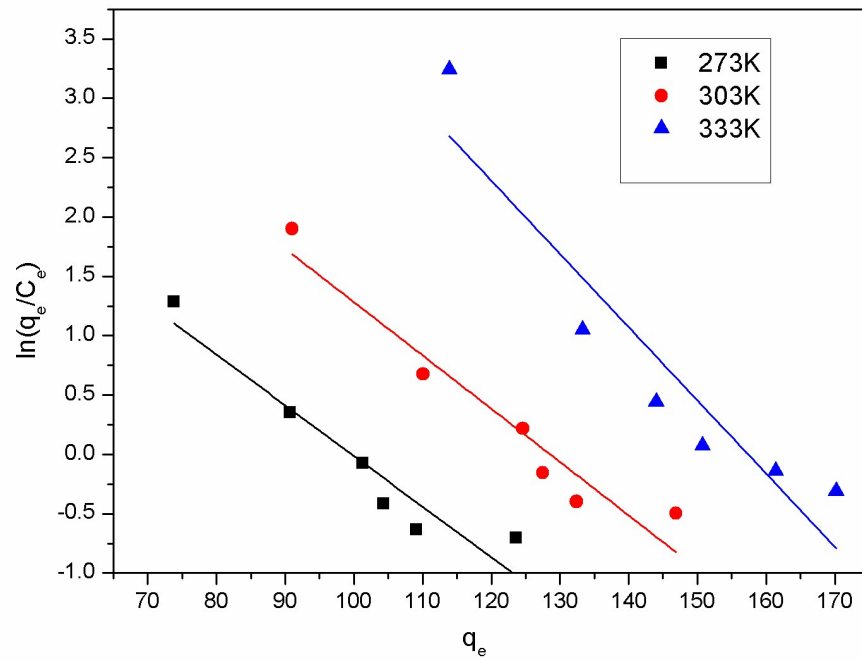

**Fig. S9.** Plots of  $\ln q_e/C_e$  versus  $q_e$  at various temperatures.



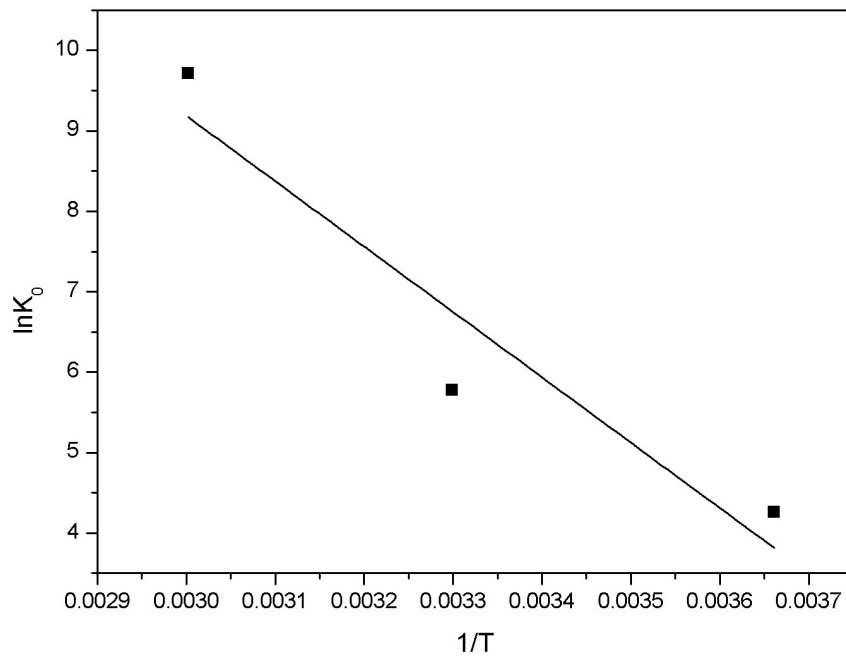

**Fig. S10.** Van't Hoff Plot for the adsorption of Cr (VI) ions adsorption by HDA-RGO-ZnFe<sub>2</sub>O<sub>4</sub> nanoparticles
